# Supplementary material
Source: PubMed Central journal article supplement (PMC552952)
Supplement: nar_33_4_1298__1.pdf [file nar_33_4_1298__1.pdf]

**Supplementary Table S1. Histone genes sequences analyzed in this paper****S1A. Human Histone Genes**

| Histone Sequence Name                                                                                       | Sequence surrounding the first codon (-10/+10) |
|-------------------------------------------------------------------------------------------------------------|------------------------------------------------|
| >GI 21071025 REF NM_005319.3  HOMO SAPIENS HISTONE 1, H1C (HIST1H1C), MRNA                                  | GATTCTCAACATGTCCGAGA                           |
| >GI 20544164 REF NM_005321.2  HOMO SAPIENS HISTONE 1, H1E (HIST1H1E), MRNA                                  | TGCCTTCAACATGTCCGAGA                           |
| >GI 20336759 REF NM_006026.2  HOMO SAPIENS H1 HISTONE FAMILY, MEMBER X (H1FX), MRNA                         | TCTTGCTACCATGTCCGTGG                           |
| >GI 15718716 REF NM_005322.2  HOMO SAPIENS HISTONE 1, H1B (HIST1H1B), MRNA                                  | TCTTGCCACCATGTCCGAAA                           |
| >GI 24475862 REF NM_153833.1  HOMO SAPIENS H1 HISTONE FAMILY, MEMBER O, OOCYTE-SPECIFIC (H1FOO), MRNA       | TGTCGGTCTCATGGCTCCTG                           |
| >GI 21264571 REF NM_005325.2  HOMO SAPIENS HISTONE 1, H1A (HIST1H1A), MRNA                                  | GTTACTCACCATGTCTGAAA                           |
| >GI 20544167 REF NM_005323.3  HOMO SAPIENS HISTONE 1, H1T (HIST1H1T), MRNA                                  | CTCTGTTGTTATGTCTGAAA                           |
| >GI 20544161 REF NM_005320.2  HOMO SAPIENS HISTONE 1, H1D (HIST1H1D), MRNA                                  | AGACAAAACATGTCCGAGA                            |
| >GI 20336758 REF NM_005318.2  HOMO SAPIENS H1 HISTONE FAMILY, MEMBER O (H1FO), MRNA                         | ACAGGCCACCATGACCGAGA                           |
| >GI 27436923 REF NM_003517.2  HOMO SAPIENS HISTONE 2, H2AC (HIST2H2AC), MRNA                                | GATTTCAGTCATGTCTGGTC                           |
| >GI 15718714 REF NM_003510.2  HOMO SAPIENS HISTONE 1, H2AK (HIST1H2AK), MRNA                                | TTTTTACGTCATGTCCGGAC                           |
| >GI 15718715 REF NM_021066.2  HOMO SAPIENS HISTONE 1, H2AJ (HIST1H2AJ), MRNA                                | ACCTTTTGCCATGTCTGGGC                           |
| >GI 41406072 REF NM_138635.2  HOMO SAPIENS H2A HISTONE FAMILY, MEMBER V (H2AFV), TRANSCRIPT VARIANT 2, MRNA | CGCCGAGAACATGGCTGGAG                           |
| >GI 41406070 REF NM_201517.1  HOMO SAPIENS H2A HISTONE FAMILY, MEMBER V (H2AFV), TRANSCRIPT VARIANT 5, MRNA | CGCCGAGAACATGGCTGGAG                           |
| >GI 41406068 REF NM_201516.1  HOMO SAPIENS H2A HISTONE FAMILY, MEMBER V (H2AFV), TRANSCRIPT VARIANT 4, MRNA | CGCCGAGAACATGGCTGGAG                           |
| >GI 41406066 REF NM_201436.1  HOMO SAPIENS H2A HISTONE FAMILY, MEMBER V (H2AFV), TRANSCRIPT VARIANT 3, MRNA | CGCCGAGAACATGTTTCCTG                           |
| >GI 41406065 REF NM_012412.3  HOMO SAPIENS H2A HISTONE FAMILY, MEMBER V (H2AFV), TRANSCRIPT VARIANT 1, MRNA | CGCCGAGAACATGGCTGGAG                           |
| >GI 38570130 REF NM_021064.3  HOMO SAPIENS HISTONE 1, H2AG (HIST1H2AG), MRNA                                | TGCGCTCGCTATGTCTGGAC                           |
| >GI 29553976 REF NM_018267.2  HOMO SAPIENS H2A HISTONE FAMILY, MEMBER J (H2AFJ), TRANSCRIPT VARIANT 1, MRNA | AGAGGTGATCATGTCCGGTC                           |
| >GI 29553969 REF NM_177925.1  HOMO SAPIENS H2A HISTONE FAMILY, MEMBER J (H2AFJ), TRANSCRIPT VARIANT 2, MRNA | AGAGGTGATCATGTCCGGTC                           |
| >GI 29171728 REF NM_175065.2  HOMO SAPIENS HISTONE 2, H2AB (HIST2H2AB), MRNA                                | TTTAGCCGTAATGTCAGGAC                           |
| >GI 29171724 REF NM_170745.2  HOMO SAPIENS HISTONE 1, H2AA (HIST1H2AA), MRNA                                | ATGCGAGGAGATGTCTGGAC                           |
| >GI 21396481 REF NM_003512.3  HOMO SAPIENS HISTONE 1, H2AC (HIST1H2AC), MRNA                                | TCTGATTGCAATGTCTGGAC                           |
| >GI 21328454 REF NM_003516.2  HOMO SAPIENS HISTONE 2, H2AA (HIST2H2AA), MRNA                                | TATCGCTGTCATGTCTGGTC                           |
| >GI 20336749 REF NM_002106.2  HOMO SAPIENS H2A HISTONE FAMILY, MEMBER Z (H2AFZ), MRNA                       | GGAATTCGAAATGGCTGGCG                           |
| >GI 20336747 REF NM_138610.1  HOMO SAPIENS H2A HISTONE FAMILY, MEMBER Y (H2AFY), TRANSCRIPT VARIANT 3, MRNA | GGCCACCGCCATGTCCGAGCC                          |
| >GI 20336745 REF NM_138609.1  HOMO SAPIENS H2A HISTONE FAMILY, MEMBER Y (H2AFY), TRANSCRIPT VARIANT 1, MRNA | GGCCACCGCCATGTCCGAGCC                          |

|                                                                                                             |                       |
|-------------------------------------------------------------------------------------------------------------|-----------------------|
| >GI 20336744 REF NM_004893.2  HOMO SAPIENS H2A HISTONE FAMILY, MEMBER Y (H2AFY), TRANSCRIPT VARIANT 2, MRNA | GGCCACCGCCATGTCGAGCC  |
| >GI 15718717 REF NM_003511.2  HOMO SAPIENS HISTONE 1, H2AL (HIST1H2AL), MRNA                                | TTTCTTCGTCATGTCGGGAC  |
| >GI 8923919 REF NM_018649.1  HOMO SAPIENS H2A HISTONE FAMILY, MEMBER Y2 (H2AFY2), MRNA                      | CTGAAGCAAGATGTCGGGCC  |
| >GI 41151667 REF XM_373381.1  HOMO SAPIENS H2A HISTONE FAMILY, MEMBER B (H2AFB), MRNA                       | AACGCCCAGCATGCCGAGGA  |
| >GI 28872747 REF NM_033445.2  HOMO SAPIENS HISTONE 3, H2A (HIST3H2A), MRNA                                  | TGACTCGGAAATGTCGGGTC  |
| >GI 19557655 REF NM_003513.2  HOMO SAPIENS HISTONE 1, H2AB (HIST1H2AB), MRNA                                | AGAAGTAGTTATGTCTGGTC  |
| >GI 18105044 REF NM_080596.1  HOMO SAPIENS HISTONE 1, H2AH (HIST1H2AH), MRNA                                | TGTGACCAGTATGTCTGGAC  |
| >GI 15718713 REF NM_003509.2  HOMO SAPIENS HISTONE 1, H2AI (HIST1H2AI), MRNA                                | GCCTTTTGCCATGTCTGGGC  |
| >GI 4504252 REF NM_002105.1  HOMO SAPIENS H2A HISTONE FAMILY, MEMBER X (H2AFX), MRNA                        | CCTCGCTAGCATGTCGGGCC  |
| >GI 19557652 REF NM_021065.2  HOMO SAPIENS HISTONE 1, H2AD (HIST1H2AD), MRNA                                | AGAATTCAAAATGTCGGGAC  |
| >GI 19557649 REF NM_021052.2  HOMO SAPIENS HISTONE 1, H2AE (HIST1H2AE), MRNA                                | GGAAGCCACTATGTCTGGAC  |
| >GI 15718718 REF NM_003514.2  HOMO SAPIENS HISTONE 1, H2AM (HIST1H2AM), MRNA                                | TCGTTTTACCATGTCTGGAC  |
| >GI 28558999 REF NM_170610.2  HOMO SAPIENS HISTONE 1, H2BA (HIST1H2BA), MRNA                                | TGTGGTAGCTATGCCGAGG   |
| >GI 21396483 REF NM_003523.2  HOMO SAPIENS HISTONE 1, H2BE (HIST1H2BE), MRNA                                | CAAAGATAGCATGCCTGAGC  |
| >GI 21396482 REF NM_003522.3  HOMO SAPIENS HISTONE 1, H2BF (HIST1H2BF), MRNA                                | TTTATTTATCATGCCTGAAC  |
| >GI 20336751 REF NM_138720.1  HOMO SAPIENS HISTONE 1, H2BD (HIST1H2BD), TRANSCRIPT VARIANT 2, MRNA          | TAACGCTACGATGCCTGAAC  |
| >GI 20336750 REF NM_021063.2  HOMO SAPIENS HISTONE 1, H2BD (HIST1H2BD), TRANSCRIPT VARIANT 1, MRNA          | TAACGCTACGATGCCTGAAC  |
| >GI 19924303 REF NM_021062.2  HOMO SAPIENS HISTONE 1, H2BB (HIST1H2BB), MRNA                                | AGGAATAGCAATGCCTGAAC  |
| >GI 18105047 REF NM_080593.1  HOMO SAPIENS HISTONE 1, H2BK (HIST1H2BK), MRNA                                | CGCCTTCAACATGCCGGAAC  |
| >GI 16306565 REF NM_003527.4  HOMO SAPIENS HISTONE 1, H2BO (HIST1H2BO), MRNA                                | CTCCTCCGCCATGCCGACC   |
| >GI 11036645 REF NM_017445.1  HOMO SAPIENS H2B HISTONE FAMILY, MEMBER S (H2BFS), MRNA                       | CGCCTTCAACATGCCGAGC   |
| >GI 22027639 REF NM_003528.2  HOMO SAPIENS HISTONE 2, H2BE (HIST2H2BE), MRNA                                | GTGTCTTACCATGCCTGAAC  |
| >GI 21166388 REF NM_003526.2  HOMO SAPIENS HISTONE 1, H2BC (HIST1H2BC), MRNA                                | GTGTTTTAAGATGCCTGAGC  |
| >GI 20336753 REF NM_021058.3  HOMO SAPIENS HISTONE 1, H2BJ (HIST1H2BJ), MRNA                                | ACACAGTGCTATGCCAGAGC  |
| >GI 15718720 REF NM_003520.3  HOMO SAPIENS HISTONE 1, H2BN (HIST1H2BN), MRNA                                | ACTCCCAGTCATGCCGAGC   |
| >GI 15718719 REF NM_003519.3  HOMO SAPIENS HISTONE 1, H2BL (HIST1H2BL), MRNA                                | TTGTTTCATTATGCCGAGC   |
| >GI 28872748 REF NM_175055.2  HOMO SAPIENS HISTONE 3, H2BB (HIST3H2BB), MRNA                                | CTCAGCCATCATGCCAGACC  |
| >GI 21536482 REF NM_003518.3  HOMO SAPIENS HISTONE 1, H2BG (HIST1H2BG), MRNA                                | TTCTGACAGCATGCCTGAAC  |
| >GI 21166387 REF NM_003525.2  HOMO SAPIENS HISTONE 1, H2BI (HIST1H2BI), MRNA                                | GGCTGCGAACATGCCTGAAC  |
| >GI 21166386 REF NM_003524.2  HOMO SAPIENS HISTONE 1, H2BH (HIST1H2BH), MRNA                                | TC'TTGTTGCAATGCCTGATC |
| >GI 15718721 REF NM_003521.2  HOMO SAPIENS HISTONE 1, H2BM (HIST1H2BM), MRNA                                | GTTTTCCACCATGCCTGAAC  |
| >GI 38373691 REF NM_005324.3  HOMO SAPIENS H3 HISTONE, FAMILY 3B (H3.3B) (H3F3B), MRNA                      | GTGAAAGAAAATGGCCCGAA  |
| >GI 39812261 REF NM_003530.3  HOMO SAPIENS HISTONE                                                          | GAAGTTCGCAATGGCTCGTA  |

|                                                                                |                                                                            |                      |
|--------------------------------------------------------------------------------|----------------------------------------------------------------------------|----------------------|
| 1, H3D (HIST1H3D), MRNA                                                        | >GI 31742502 REF NM_021059.2  HOMO SAPIENS HISTONE 2, H3C (HIST2H3C), MRNA | TTGGTTCGCTATGGCCCGTA |
| >GI 22027640 REF NM_002107.2  HOMO SAPIENS H3 HISTONE, FAMILY 3A (H3F3A), MRNA | TCTCTGTACCATGGCTCGTA                                                       |                      |
| >GI 21396498 REF NM_003537.3  HOMO SAPIENS HISTONE 1, H3B (HIST1H3B), MRNA     | TGGT'TTTGCCATGGCTCGTA                                                      |                      |
| >GI 21264570 REF NM_003534.2  HOMO SAPIENS HISTONE 1, H3G (HIST1H3G), MRNA     | GTAGTCTGAGATGGCCCGCA                                                       |                      |
| >GI 21264566 REF NM_003532.2  HOMO SAPIENS HISTONE 1, H3E (HIST1H3E), MRNA     | CAGATGAACTATGGCGCGTA                                                       |                      |
| >GI 21071022 REF NM_003531.2  HOMO SAPIENS HISTONE 1, H3C (HIST1H3C), MRNA     | CTCAT'TGCAAATGGCTCGTA                                                      |                      |
| >GI 19743834 REF NM_003493.2  HOMO SAPIENS HISTONE 3, H3 (HIST3H3), MRNA       | T'TTCGGATT'CATGGCCCGAA                                                     |                      |
| >GI 19743828 REF NM_003529.2  HOMO SAPIENS HISTONE 1, H3A (HIST1H3A), MRNA     | T'TTTTCCGTCATGGCTCGCA                                                      |                      |
| >GI 15718725 REF NM_003536.2  HOMO SAPIENS HISTONE 1, H3H (HIST1H3H), MRNA     | CTCTGAAGGCATGGCGCGTA                                                       |                      |
| >GI 15718724 REF NM_003535.2  HOMO SAPIENS HISTONE 1, H3J (HIST1H3J), MRNA     | T'TTCTCAACTATGGCCCGGA                                                      |                      |
| >GI 15718723 REF NM_003533.2  HOMO SAPIENS HISTONE 1, H3I (HIST1H3I), MRNA     | CTACTTAGCCATGGCACGAA                                                       |                      |
| >GI 21396497 REF NM_021018.2  HOMO SAPIENS HISTONE 1, H3F (HIST1H3F), MRNA     | ACCCAT'TCCTATGGCACGCA                                                      |                      |
| >GI 29553982 REF NM_003548.2  HOMO SAPIENS HISTONE 2, H4 (HIST2H4), MRNA       | TCCAGCGGTCATG'TCCGGCA                                                      |                      |
| >GI 21264599 REF NM_003543.3  HOMO SAPIENS HISTONE 1, H4H (HIST1H4H), MRNA     | TTGCTTAGTCATGTCTGGCC                                                       |                      |
| >GI 21166392 REF NM_003544.2  HOMO SAPIENS HISTONE 1, H4B (HIST1H4B), MRNA     | CTGGTTAGACATGTCTGGTC                                                       |                      |
| >GI 21071024 REF NM_003542.3  HOMO SAPIENS HISTONE 1, H4C (HIST1H4C), MRNA     | GATAGGAATCATGTCTGGTC                                                       |                      |
| >GI 16306592 REF NM_021968.3  HOMO SAPIENS HISTONE 1, H4J (HIST1H4J), MRNA     | CTTGCTCGTCATGTCTGGCC                                                       |                      |
| >GI 15718726 REF NM_003541.2  HOMO SAPIENS HISTONE 1, H4K (HIST1H4K), MRNA     | CTTGCTCGTCATGTCTGGCC                                                       |                      |
| >GI 21166390 REF NM_003538.3  HOMO SAPIENS HISTONE 1, H4A (HIST1H4A), MRNA     | TTGGGAAGTCATGTCTGGAC                                                       |                      |
| >GI 28416433 REF NM_175054.2  HOMO SAPIENS HISTONE 4, H4 (HIST4H4), MRNA       | TGAT'TTCAGAATGTCTGGGC                                                      |                      |
| >GI 21264600 REF NM_003545.3  HOMO SAPIENS HISTONE 1, H4E (HIST1H4E), MRNA     | TGTGTTGGTCATGTCTGGTC                                                       |                      |
| >GI 21166393 REF NM_003547.2  HOMO SAPIENS HISTONE 1, H4G (HIST1H4G), MRNA     | CTTGTTTATCATGTCTGTTC                                                       |                      |
| >GI 21166391 REF NM_003540.3  HOMO SAPIENS HISTONE 1, H4F (HIST1H4F), MRNA     | GTCTTCGATCATGTCTGGTA                                                       |                      |
| >GI 21071023 REF NM_003539.3  HOMO SAPIENS HISTONE 1, H4D (HIST1H4D), MRNA     | GTGGTTTCAAGATGTCTGGC                                                       |                      |
| >GI 18105065 REF NM_003495.2  HOMO SAPIENS HISTONE 1, H4I (HIST1H4I), MRNA     | CCACTTGATAATGTCAGGAC                                                       |                      |
| >GI 15718728 REF NM_003546.2  HOMO SAPIENS HISTONE 1, H4L (HIST1H4L), MRNA     | AGTACAAGACATGTCTGGGC                                                       |                      |

#### S1B. Mouse Histone Genes

| Histone Sequence Name                                                                                 | Sequence (-10/10)     |
|-------------------------------------------------------------------------------------------------------|-----------------------|
| >GI 19923864 REF NM_138311.1  MUS MUSCULUS H1 HISTONE FAMILY, MEMBER O, OOCYTE-SPECIFIC (H1FOO), MRNA | TGCCTGTGCCATGGCTCCTG  |
| >GI 34328364 REF NM_145713.2  MUS MUSCULUS HISTONE 1, H1D (HIST1H1D), MRNA                            | AGCTTAGAACATGTCCGAGA  |
| >GI 31560696 REF NM_008197.2  MUS MUSCULUS H1 HISTONE FAMILY, MEMBER O (H1F0), MRNA                   | GCCGGCCACCATGACCGAGA  |
| >GI 21426892 REF NM_020034.1  MUS MUSCULUS HISTONE 1, H1B (HIST1H1B), MRNA                            | TGT'TCTCGCCATGTCTGAGA |
| >GI 21426822 REF NM_030609.1  MUS MUSCULUS HISTONE 1, H1A (HIST1H1A), MRNA                            | ATCAGCGACCATGTCGGAGA  |
| >GI 13430889 REF NM_015787.1  MUS MUSCULUS HISTONE                                                    | ACGCTTCGCCATGTCCGAGA  |

|                                                                                         |                       |
|-----------------------------------------------------------------------------------------|-----------------------|
| 1, H1E (HIST1H1E), MRNA                                                                 |                       |
| >GI 9845256 REF NM_015786.1  MUS MUSCULUS HISTONE 1, H1C (HIST1H1C), MRNA               | GAGACTCATCATGTCTGAGG  |
| >GI 6754113 REF NM_010377.1  MUS MUSCULUS HISTONE 1, H1T (HIST1H1T), MRNA               | GCTCTTGACCATGTCCGAAA  |
| >GI 20892698 REF XM_147155.1  MUS MUSCULUS H1 HISTONE FAMILY, MEMBER 4 (H1F4), MRNA     | GGCCCGAGTCCTGGCCAGTC  |
| >GI 13385733 REF NM_026230.1  MUS MUSCULUS H2A HISTONE FAMILY, MEMBER Y2 (H2AFY2), MRNA | TCGAGGCAAGATGTCAGGCC  |
| >GI 46250737 REF NM_207000.1  MUS MUSCULUS H2A HISTONE FAMILY, MEMBER Y3 (H2AFY3), MRNA | TCGAGGCAAGATGTCAGGCC  |
| >GI 46048349 REF NM_178218.2  MUS MUSCULUS HISTONE 3, H2A (HIST3H2A), MRNA              | TCAGTGAAGATGTCTGGTC   |
| >GI 41152516 REF NM_012015.1  MUS MUSCULUS H2A HISTONE FAMILY, MEMBER Y (H2AFY), MRNA   | GGCTGTCGCCATGTCGAGCC  |
| >GI 37059773 REF NM_178213.2  MUS MUSCULUS HISTONE 2, H2AB (HIST2H2AB), MRNA            | ACTCTAAGTTATGTCTGGCC  |
| >GI 31982205 REF NM_178187.2  MUS MUSCULUS HISTONE 1, H2AE (HIST1H2AE), MRNA            | TCTTGCGTCAATGCTCTGGAC |
| >GI 31981698 REF NM_010436.2  MUS MUSCULUS H2A HISTONE FAMILY, MEMBER X (H2AFX), MRNA   | CTCGTACACTATGTCGGAC   |
| >GI 31542957 REF NM_178189.2  MUS MUSCULUS HISTONE 1, H2AC (HIST1H2AC), MRNA            | CACTATTACTATGTCTGGAC  |
| >GI 30089709 REF NM_175662.1  MUS MUSCULUS HISTONE 2, H2AC (HIST2H2AC), MRNA            | ACTCTAAGTTATGTCTGGCC  |
| >GI 30061398 REF NM_178212.1  MUS MUSCULUS HISTONE 2, H2AA2 (HIST2H2AA2), MRNA          | CGCTTTCGTGATGTCGGTC   |
| >GI 30061392 REF NM_178182.1  MUS MUSCULUS HISTONE 1, H2AI (HIST1H2AI), MRNA            | CAGCTGAGTTATGTCTGGAC  |
| >GI 30061378 REF NM_175661.1  MUS MUSCULUS HISTONE 1, H2AF (HIST1H2AF), MRNA            | GGTACCTACAATGTCTGGAC  |
| >GI 30061374 REF NM_178185.1  MUS MUSCULUS HISTONE 1, H2AO (HIST1H2AO), MRNA            | ACTTCTACCATGTCTGGAC   |
| >GI 30061370 REF NM_178183.1  MUS MUSCULUS HISTONE 1, H2AK (HIST1H2AK), MRNA            | AGGTCTACCATGTCAGGAA   |
| >GI 30061368 REF NM_175660.1  MUS MUSCULUS HISTONE 1, H2AB (HIST1H2AB), MRNA            | AAACGCATACATGCTCTGGAC |
| >GI 30061364 REF NM_178184.1  MUS MUSCULUS HISTONE 1, H2AN (HIST1H2AN), MRNA            | TTTGTTTAGAATGTCTGGAC  |
| >GI 30061360 REF NM_178186.1  MUS MUSCULUS HISTONE 1, H2AG (HIST1H2AG), MRNA            | AATCTTTACAATGTCTGGAC  |
| >GI 30061356 REF NM_178188.1  MUS MUSCULUS HISTONE 1, H2AD (HIST1H2AD), MRNA            | AATCTGTACAATGTCTGGAC  |
| >GI 30061326 REF NM_175659.1  MUS MUSCULUS HISTONE 1, H2AH (HIST1H2AH), MRNA            | GTTGTACAATATGTCTGGAC  |
| >GI 28316755 REF NM_175658.1  MUS MUSCULUS HISTONE 1, H2AA (HIST1H2AA), MRNA            | TTGAAGAATCATGTCTGGTC  |
| >GI 7949044 REF NM_016750.1  MUS MUSCULUS H2A HISTONE FAMILY, MEMBER Z (H2AFZ), MRNA    | ACGGTCCGAGATGGCTGGCG  |
| >GI 20799906 REF NM_013549.1  MUS MUSCULUS HISTONE 2, H2AA1 (HIST2H2AA1), MRNA          | CGCTTTCGTGATGTCGGTC   |
| >GI 38091295 REF XM_126043.3  MUS MUSCULUS HISTONE H2A.F/Z VARIANT (H2AV-PENDING), MRNA | CTTGCCCTACATGATGTCT   |
| >GI 46049028 REF NM_206882.1  MUS MUSCULUS HISTONE 3, H2BB (HIST3H2BB), MRNA            | AAAGGGAGTGATGCCTGATC  |
| >GI 31542958 REF NM_178194.2  MUS MUSCULUS HISTONE 1, H2BE (HIST1H2BE), MRNA            | AGATCTGAAGATGCCTGAGC  |
| >GI 30089703 REF NM_175665.1  MUS MUSCULUS HISTONE 1, H2BK (HIST1H2BK), MRNA            | TTTCTACGCCATGCCTGAGC  |
| >GI 30061396 REF NM_178214.1  MUS MUSCULUS HISTONE 2, H2BE (HIST2H2BE), MRNA            | TCGCAAAAATATGGCCCGTA  |
| >GI 30061394 REF NM_178201.1  MUS MUSCULUS HISTONE 1, H2BN (HIST1H2BN), MRNA            | GGTTCAGGCATGGTAGGAAC  |
| >GI 30061390 REF NM_178202.1  MUS MUSCULUS HISTONE 1, H2BP (HIST1H2BP), MRNA            | CTGACCTAACATGCCTGAGC  |

|                                                                                |                                        |
|--------------------------------------------------------------------------------|----------------------------------------|
| >GI 30061388 REF NM_178199.1  MUS MUSCULUS HISTONE 1, H2BL (HIST1H2BL), MRNA   | TCCTCTCAGTATGCCTGAGC                   |
| >GI 30061386 REF NM_178197.1  MUS MUSCULUS HISTONE 1, H2BH (HIST1H2BH), MRNA   | TCTGTTCACATGCCTGAGC                    |
| >GI 30061384 REF NM_178200.1  MUS MUSCULUS HISTONE 1, H2BM (HIST1H2BM), MRNA   | GTGTGTGAACATGCCTGAGC                   |
| >GI 30061382 REF NM_178195.1  MUS MUSCULUS HISTONE 1, H2BF (HIST1H2BF), MRNA   | CTCACCAACCATGCCTGAGC                   |
| >GI 30061380 REF NM_178198.1  MUS MUSCULUS HISTONE 1, H2BJ (HIST1H2BJ), MRNA   | CTGTCTCACTATGCCTGAGC                   |
| >GI 28316759 REF NM_175664.1  MUS MUSCULUS HISTONE 1, H2BB (HIST1H2BB), MRNA   | TTTGAACAGAATGCCAGAGC                   |
| >GI 28316753 REF NM_175666.1  MUS MUSCULUS HISTONE 2, H2BB (HIST2H2BB), MRNA   | GCTTTTAATCATGCCTGAAC                   |
| >GI 28316749 REF NM_175663.1  MUS MUSCULUS HISTONE 1, H2BA (HIST1H2BA), MRNA   | TACTTGAGCCATGCCGAGG                    |
| >GI 17505203 REF NM_023422.1  MUS MUSCULUS HISTONE 1, H2BC (HIST1H2BC), MRNA   | AAATCCGAAGATGCCTGAGC                   |
| >GI 13386451 REF NM_030082.1  MUS MUSCULUS HISTONE 3, H2BA (HIST3H2BA), MRNA   | GTGCAGCAGGATGCCGAGC                    |
| >GI 40254304 REF NM_178196.2  MUS MUSCULUS HISTONE 1, H2BG (HIST1H2BG), MRNA   | TGTTTCTACCATGCCCGAGC                   |
| >GI 34328342 REF NM_054045.2  MUS MUSCULUS HISTONE 2, H3C2 (HIST2H3C2), MRNA   | CGTCTTCGCCATGGCCCGTA                   |
| >GI 34328214 REF NM_013550.3  MUS MUSCULUS HISTONE 1, H3A (HIST1H3A), MRNA     | AGTTTTTGCTATGGCTCGTA                   |
| >GI 31982294 REF NM_008210.2  MUS MUSCULUS H3 HISTONE, FAMILY 3A (H3F3A), MRNA | TGTCCTTACCATGGCTCGTA                   |
| >GI 31542930 REF NM_008211.2  MUS MUSCULUS H3 HISTONE, FAMILY 3B (H3F3B), MRNA | GTGAAAAAAAAATGGCCCGAA                  |
| >GI 30102949 REF NM_013548.2  MUS MUSCULUS HISTONE 1, H3F (HIST1H3F), MRNA     | CTTTGTAGAAATGGCTCGTA                   |
| >GI 30061400 REF NM_178216.1  MUS MUSCULUS HISTONE 2, H3C1 (HIST2H3C1), MRNA   | GCCACGGCCAATGGCGCGC                    |
| >GI 30061346 REF NM_178215.1  MUS MUSCULUS HISTONE 2, H3B (HIST2H3B), MRNA     | TCGCAAAAATATGGCCCGTA                   |
| >GI 30061344 REF NM_178207.1  MUS MUSCULUS HISTONE 1, H3I (HIST1H3I), MRNA     | GGGTGTTACCATGGCTCGTA                   |
| >GI 30061342 REF NM_178206.1  MUS MUSCULUS HISTONE 1, H3H (HIST1H3H), MRNA     | GTGTACTGAGATGGCTCGTA                   |
| >GI 30061340 REF NM_178205.1  MUS MUSCULUS HISTONE 1, H3E (HIST1H3E), MRNA     | GTGTACTGAGATGGCTCGTA                   |
| >GI 30061338 REF NM_178203.1  MUS MUSCULUS HISTONE 1, H3B (HIST1H3B), MRNA     | TGTTAAAGTCATGGCTCGTA                   |
| >GI 21489954 REF NM_145073.1  MUS MUSCULUS HISTONE 1, H3G (HIST1H3G), MRNA     | GTTACTTGCCATGGCTCGTA                   |
| >GI 9506766 REF NM_019469.1  MUS MUSCULUS HISTONE 2, H3C1 (HIST2H3C1), MRNA    | TCGCAAAAATATGGCCCGTA                   |
| >GI 20913710 REF XM_122348.1  MUS MUSCULUS H3 HISTONE, FAMILY 3B (H3F3B), MRNA | GTGAAAAAAAAATGGCCCGAA                  |
| >GI 20897549 REF XM_147791.1  MUS MUSCULUS H3 HISTONE, FAMILY 3A (H3F3A), MRNA | GTAGTTC <b>T</b> GAATG <b>T</b> TAGATA |
| >GI 46430492 REF NM_175656.1  MUS MUSCULUS HISTONE 1, H4I (HIST1H4I), MRNA     | TGTCTTCATCATGTCTGGTC                   |
| >GI 30089713 REF NM_175654.1  MUS MUSCULUS HISTONE 1, H4D (HIST1H4D), MRNA     | GT'TTGCTAACATGTCTGGAC                  |
| >GI 30089707 REF NM_175657.1  MUS MUSCULUS HISTONE 1, H4M (HIST1H4M), MRNA     | TGTCTTCATCATGTCTGGTC                   |
| >GI 30061404 REF NM_178193.1  MUS MUSCULUS HISTONE 1, H4B (HIST1H4B), MRNA     | GAATTTAACTATGTCTGGTC                   |
| >GI 30061402 REF NM_178192.1  MUS MUSCULUS HISTONE 1, H4A (HIST1H4A), MRNA     | TTCCTAAGACATGTCTGGTC                   |
| >GI 30061358 REF NM_178211.1  MUS MUSCULUS HISTONE 1, H4K (HIST1H4K), MRNA     | GAGTGCAGTCATGTCTGGCA                   |
| >GI 30061354 REF NM_175655.1  MUS MUSCULUS HISTONE 1, H4F (HIST1H4F), MRNA     | CTCCATAGCCATGTCTGGTC                   |

|                                                                            |                      |
|----------------------------------------------------------------------------|----------------------|
| >GI 30061350 REF NM_178210.1  MUS MUSCULUS HISTONE 1, H4J (HIST1H4J), MRNA | GAGTGCAGTCATGTCTGGCA |
| >GI 30061348 REF NM_178208.1  MUS MUSCULUS HISTONE 1, H4C (HIST1H4C), MRNA | TGTCATAACCATGTCTGGAC |
| >GI 28316745 REF NM_175652.1  MUS MUSCULUS HISTONE 4, H4 (HIST4H4), MRNA   | GTTTACTAATATGTCAGGAC |
| >GI 23943921 REF NM_153173.1  MUS MUSCULUS HISTONE 1, H4H (HIST1H4H), MRNA | CAAGTACACCATGTCTGGTC |
| >GI 21361208 REF NM_033596.1  MUS MUSCULUS HISTONE 2, H4 (HIST2H4), MRNA   | TACATTAGCTATGTCTGGCA |
| >GI 38074378 REF XM_110064.3  MUS MUSCULUS HISTONE 1, H4I (HIST1H4I), MRNA | TGTCTTCATCATGTCTGGTC |

**Supplementary Table S2. Putative alternative translational products of histone genes**

Each human and each mouse histone gene that lack either R<sub>3</sub> or G<sub>4</sub> was screened for the presence of potential alternative ORFs coding at least 16 amino acids. '← →' indicates similar alternative translation products derived from pairs of human and mouse genes.

|    | Human histones              | Alt. ORF (nt) | Positions -6/+4 alt ORF | In Frame? | Homology | Mouse histones | Alt. ORF (nt) | Positions -6/+4 alt ORF | In Frame? |
|----|-----------------------------|---------------|-------------------------|-----------|----------|----------------|---------------|-------------------------|-----------|
|    |                             |               |                         |           |          | Hist1h1b       | 215-265       | GCTACGATGT              | No        |
| 1  | HIST1H1C                    | 212-265       | CCGGCTATGA              | No        |          |                |               |                         |           |
|    |                             | 215-265       | GCTATGATGT              | No        |          |                |               |                         |           |
| 2  | HIST1H1E                    | 212-265       | CTGGCTATGA              | No        |          |                |               |                         |           |
| 3  | HIST1H1T                    | 49-624        | GCCGCTATGG              | Yes       |          | Hist1h1t       | 175-627       | GCAGGAATGT              | Yes       |
|    |                             |               |                         |           |          |                | 397-627       | AAGAAGATGG              | Yes       |
| 4  | H1F0                        | 91-585        | TCAGACATGA              | Yes       | ← →      | H1f0           | 91-585        | TCAGACATGA              | Yes       |
|    |                             |               |                         |           |          |                | 296-538       | AGGGCGATGA              | No        |
| 5  | H1FOO                       | 172-1041      | CTACGCATGG              | Yes       |          |                |               |                         |           |
|    |                             | 313-1041      | ACTGGCATGC              | Yes       |          |                |               |                         |           |
|    |                             | 418-1041      | AGGAAGATGG              | Yes       |          |                |               |                         |           |
| 6  | H1FX                        | 49-642        | GAGGGAATGG              | Yes       |          |                |               |                         |           |
| 7  | HIST1H2AA                   | 206-259       | CAGGCAATGC              | No        |          |                |               |                         |           |
| 8  | HIST1H2AB                   | 206-304       | CGGGCAATGC              | No        | ← →      | Hist1h2ab      | 206-304       | CGGGCAATGC              | No        |
| 9  | HIST1H2AG                   | 119-178       | GCAACTATGC              | No        |          |                |               |                         |           |
| 10 | HIST1H2AH                   | 119-178       | GTAATTATGC              | No        |          |                |               |                         |           |
| 11 | HIST1H2AI                   | 119-178       | GCAACTATGC              | No        |          |                |               |                         |           |
|    |                             | 272-406       | GCAACGATGA              | No        |          |                |               |                         |           |
| 12 | HIST1H2AJ                   | 119-178       | GCAACTATGC              | No        |          |                |               |                         |           |
| 13 | HIST1H2AL                   | 119-178       | GCAACTATGC              | No        |          |                |               |                         |           |
| 14 | HIST2H2AA                   | 154-393       | GTCTACATGG              | Yes       | ← →      | Hist2h2aa1     | 154-393       | GTATACATGG              | Yes       |
| A  |                             |               |                         |           |          | Hist2h2aa2     | 154-393       | GTATACATGG              | Yes       |
| 15 | HIST2H2AB                   | 269-397       | TGAGGAATGA              | No        |          | Hist2h2ab      | 154-390       | GTATACATGG              | Yes       |
| 16 | HIST2H2AC                   | 154-390       | GTCTACATGG              | Yes       | ← →      | Hist2h2ac      | 154-390       | GTATACATGG              | Yes       |
| 17 | H2AFB                       | 268-348       | CTGGACATGG              | Yes       |          |                |               |                         |           |
| 18 | H2AFJ                       | 387-539       | GAGCAAATGA              | No        |          |                |               |                         |           |
| 19 | H2AFV                       | 53-160        | CAAGCCATGG              | No        |          |                |               |                         |           |
| 20 | H2AFX                       | 206-304       | CGGGCAATGC              | No        |          |                |               |                         |           |
| 21 | H2AFY Transcript Variance 1 | 82-1119       | GGGCGGATGC              | Yes       | ← →      | H2afy          | 82-1119       | GGACGCATGC              | Yes       |
|    |                             | 145-1119      | GTGTACATGG              | Yes       | ← →      |                | 145-1119      | GTGTACATGG              | Yes       |

|    |                                   |          |            |          |                  |            |            |            |     |
|----|-----------------------------------|----------|------------|----------|------------------|------------|------------|------------|-----|
|    |                                   | 197-274  | CTGGCAATGC | No       | ← →              |            | 197-250    | CTGGCAATGC | No  |
| 22 | H2AFY<br>Transcript<br>Variance 2 | 82-1110  | GGGCGGATGC | Yes      |                  |            |            |            |     |
|    |                                   | 145-1110 | GTGTACATGG | Yes      |                  |            |            |            |     |
|    |                                   | 197-274  | CTGGCAATGC | No       |                  |            |            |            |     |
| 23 | H2AFY<br>Transcript<br>Variance 3 | 82-1116  | GGGCGGATGC | Yes      |                  |            |            |            |     |
|    |                                   | 145-1116 | GTGTACATGG | Yes      |                  |            |            |            |     |
|    |                                   | 197-274  | CTGGCAATGC | No       |                  |            |            |            |     |
| 24 | H2AFY2                            | 28-1119  | AAGAAAATGT | Yes      | ← →              | H2afy2     | 28-1149    | AAGAAAATGT | Yes |
|    |                                   | 85-1119  | AGGCTGATGC | Yes      | ← →              |            | 85-1149    | CGGTTGATGC | Yes |
|    |                                   | 145-1119 | GTCTACATGG | Yes      | ← →              |            | 145-1149   | GTCTACATGG | Yes |
|    |                                   | 530-598  | CTGAAGATGG | No       | ← →              |            | 527-595    | CGGAGGATGT | No  |
| A  |                                   |          |            |          |                  | 539-595    | CGGGGGATGG | No         |     |
| B  |                                   |          |            |          | H2afy3           | 28-1119    | AAGAAAATGT | Yes        |     |
| C  |                                   |          |            | 85-1119  |                  | CGGTTGATGC | Yes        |            |     |
| D  |                                   |          |            | 145-1119 |                  | GTCTACATGG | Yes        |            |     |
| E  |                                   |          |            | 530-598  |                  | CGGAGGATGG | No         |            |     |
| F  |                                   |          |            |          | H2av-<br>pending | 5-121      | ACATGTATGT | No         |     |
| G  |                                   |          |            | 18-203   |                  | TGCAGCATGT | No         |            |     |
| H  |                                   |          |            | 82-396   |                  | TCACACATGT | Yes        |            |     |
| I  |                                   |          |            | 140-217  |                  | CAAGCCATGG | No         |            |     |
| 25 | HIST1H2BA                         | 181-384  | AAAGCTATGA | Yes      | ← →              | Hist1h2ba  | 181-384    | AAGGCCATGA | Yes |
|    |                                   | 190-384  | AGCATTATGA | Yes      | ← →              |            | 190-384    | AGCATCATGA | Yes |
|    |                                   | 332-397  | CTAAACATGC | No       |                  |            |            |            |     |
| 26 | HIST1H2BB                         | 77-139   | AGAAGGATGG | No       | ← →              | Hist1h2bb  | 77-139     | AGAAGGATGG | No  |
| 27 | HIST1H2BC                         | 77-139   | AGAAAGATGG | No       |                  | Hist1h2bc  | 179-382    | AAGGCCATGG | No  |
| 28 | HIST1H2BD                         | 178-381  | AAGGCAATGG | Yes      |                  |            |            |            |     |
| 29 | HIST1H2BE                         | 178-381  | AAAGCCATGG | Yes      | ← →              | Hist1h2be  | 178-381    | AAGGCCATGG | Yes |
| 30 | HIST1H2BF                         | 77-139   | AGAAGGATGG | No       |                  | Hist1h2bf  | 178-381    | AAGGCCATGG | Yes |
| 31 | HIST1H2BG                         | 77-139   | AGAAGGATGG | No       |                  | Hist1h2bg  | 178-381    | AAGGCCATGG | Yes |
| 32 | HIST1H2BH                         | 77-139   | AGAAGGATGG | No       |                  | Hist1h2bh  | 178-381    | AAAGCCATGG | Yes |
| 33 | HIST1H2BI                         | 77-139   | AGAAGGATGG | No       |                  |            |            |            |     |
| 34 | HIST1H2BJ                         | 178-381  | AAGGCCATGG | Yes      | ← →              | Hist1h2bj  | 178-381    | AAGGCCATGG | Yes |
| 35 | HIST1H2BK                         | 178-381  | AAGGCCATGG | Yes      | ← →              | Hist1h2bk  | 178-381    | AAGGCCATGG | Yes |
| 36 | HIST1H2BL                         | 77-139   | AGAAGGATGG | No       |                  | Hist1h2bl  | 178-381    | AAGGCCATGG | Yes |



|    |           |         |            |     |     |           |         |            |     |
|----|-----------|---------|------------|-----|-----|-----------|---------|------------|-----|
| 37 | HIST1H2BM | 77-139  | AGAAGGATGG | No  | ← → | Hist1h2bm | 77-139  | AGAAGGATGG | No  |
| 38 | HIST1H2BN | 178-381 | AAGGCCATGG | Yes | ← → | Hist1h2bn | 178-381 | AAGGCCATGG | Yes |
| 39 | HIST1H2BO | 178-381 | AAGGCCATGG | Yes |     |           |         |            |     |
| A  |           |         |            |     |     | Hist1h2bp | 77-139  | AGAAGGATGG | No  |
| B  |           |         |            |     |     | Hist2h2bb | 77-139  | AGAAAGATGG | No  |
| 40 | HIST2H2BE | 178-381 | AAGGCCATGG | Yes |     |           |         |            |     |
| A  |           |         |            |     |     | Hist3h2ba | 77-139  | AAAAGGATGG | No  |
| 41 | HIST3H2BB | 178-381 | AAGGCCATGG | Yes |     |           | 21-92   | ATTTGAATGC | No  |
| A  |           |         |            |     |     | Hist3h2bb | 85-465  | GACATTATGC | Yes |
| B  |           |         |            |     |     |           | 161-223 | AAAAGGATGG | No  |
| 42 | H2BFS     | 178-381 | AAGGCCATGG | Yes |     |           |         |            |     |
| 43 | HIST1H3C  | 271-411 | GCGGTGATGG | Yes |     |           |         |            |     |
| A  |           |         |            |     |     | H3f3a     | 19-111  | TTTTCCATGG | Yes |
| B  |           |         |            |     |     |           | 43-111  | AAGTATATGA | Yes |
| C  |           |         |            |     |     | Hist2h3c1 | 136-546 | TTCGCCATGG | Yes |
| 44 | HIST1H3F  | 271-411 | GCTGTGATGG | Yes |     |           |         |            |     |
| 45 | HIST3H3   | 214-411 | CGGCTGATGC | Yes |     |           |         |            |     |
|    |           | 271-411 | GCCGTGATGG | Yes |     |           |         |            |     |
| 46 | HIST1H4A  | 253-312 | ACTGCCATGG | Yes | ← → | Hist1h4a  | 253-312 | ACCGCCATGG | Yes |
| 47 | HIST1H4B  | 253-312 | ACTGCCATGG | Yes | ← → | Hist1h4b  | 253-312 | ACCGCCATGG | Yes |
| 48 | HIST1H4C  | 253-312 | ACAGCCATGG | Yes | ← → | Hist1h4c  | 253-312 | ACCGCCATGG | Yes |
| A  |           |         |            |     |     | Hist1h4d  | 253-312 | ACCGCCATGG | Yes |
| 49 | HIST1H4E  | 253-312 | ACAGCGATGG | Yes |     |           |         |            |     |
| 50 | HIST1H4F  | 253-312 | ACTGCAATGG | Yes | ← → | Hist1h4f  | 253-312 | ACCGCCATGG | Yes |
| 51 | HIST1H4G  | 122-199 | CCCGGCATGG | No  |     |           |         |            |     |
| 52 | HIST1H4H  | 253-312 | ACAGCAATGG | Yes | ← → | Hist1h4h  | 253-312 | ACCGCCATGG | Yes |
| 53 | HIST1H4I  | 253-312 | ACCGCCATGG | Yes | ← → | Hist1h4i  | 253-312 | ACCGCCATGG | Yes |
| 54 | HIST1H4J  | 253-312 | ACCGCCATGG | Yes | ← → | Hist1h4j  | 253-312 | ACCGCCATGG | Yes |
| 55 | HIST1H4K  | 253-312 | ACCGCCATGG | Yes | ← → | Hist1h4k  | 253-312 | ACCGCCATGG | Yes |
| A  |           |         |            |     |     | Hist1h4m  | 253-312 | ACCGCCATGG | Yes |
| 56 | HIST2H4   | 253-312 | ACAGCCATGG | Yes | ← → | Hist2h4   | 253-312 | ACCGCTATGG | Yes |
| 57 | HIST4H4   | 253-312 | ACGGCCATGG | Yes | ← → | Hist4h4   | 253-312 | ACGGCTATGG | Yes |

**Supplementary Table S3. Femoral diaphyseal parameters in *H4tTG1* transgenic mice**

| Age<br>(weeks) | Gender | <b>Sht.Dia (mm)</b> |               | <b>Med.Dia (mm)</b> |               | <b>Ct.Th (mm)</b> |               |
|----------------|--------|---------------------|---------------|---------------------|---------------|-------------------|---------------|
|                |        | WT                  | <b>H4tTG1</b> | WT                  | <b>H4tTG1</b> | WT                | <b>H4tTG1</b> |
| 8              |        | 1.347±0.017         | 1.404±0.020   | 1.021±0.027         | 1.063±0.031   | 0.163±0.008       | 0.171±0.007   |
| 17             | F      | 1.374±0.013         | 1.376±0.024   | 0.950±0.016         | 0.943±0.018   | 0.210±0.004       | 0.213±0.005   |
| 34             |        | 1.422±0.019         | 1.423±0.027   | 0.970±0.022         | 0.974±0.032   | 0.228±0.007       | 0.225±0.008   |
| 8              |        | 1.453±0.026         | 1.457±0.033   | 1.061±0.029         | 1.056±0.030   | 0.195±0.006       | 0.197±0.006   |
| 17             | M      | 1.462±0.047         | 1.483±0.028   | 1.036±0.046         | 1.026±0.022   | 0.214±0.007       | 0.227±0.005   |
| 34             |        | 1.468±0.033         | 1.495±0.025   | 0.988±0.027         | 1.025±0.022   | 0.240±0.007       | 0.232±0.006   |

Data are mean±SEM. Differences between *H4tTG1* and WT mice are not statistically significant ( $p>0.05$ ).

Abbreviations: Sht.Dia, diaphyseal shaft diameter; Med.Dia, medullary cavity diameter; Ct.Th, cortical thickness.

**Supplementary Table S4. Femoral length\* of *H4tTG1* transgenic mice**

| Age (weeks) | Gender | WT           | <b>H4tTG1</b> |
|-------------|--------|--------------|---------------|
| 8           | F      | 14.956±0.234 | 15.340±0.245  |
| 17          |        | 16.250±0.196 | 16.068±0.155  |
| 8           | M      | 15.655±0.093 | 15.804±0.138  |
| 17          |        | 15.987±0.235 | 16.449±0.094  |

\*mm; data are mean±SEM. Differences between *H4tTG1* and WT mice are not statistically significant (p>0.05).
